# Supplementary material
Source: Springer Nature journal article supplement (https://www.springermedizin.de/resource/supplementary/12884_2008_49_MOESM7_ESM.pdf/9459818)
Supplement: MOESM7 [file 9459818]

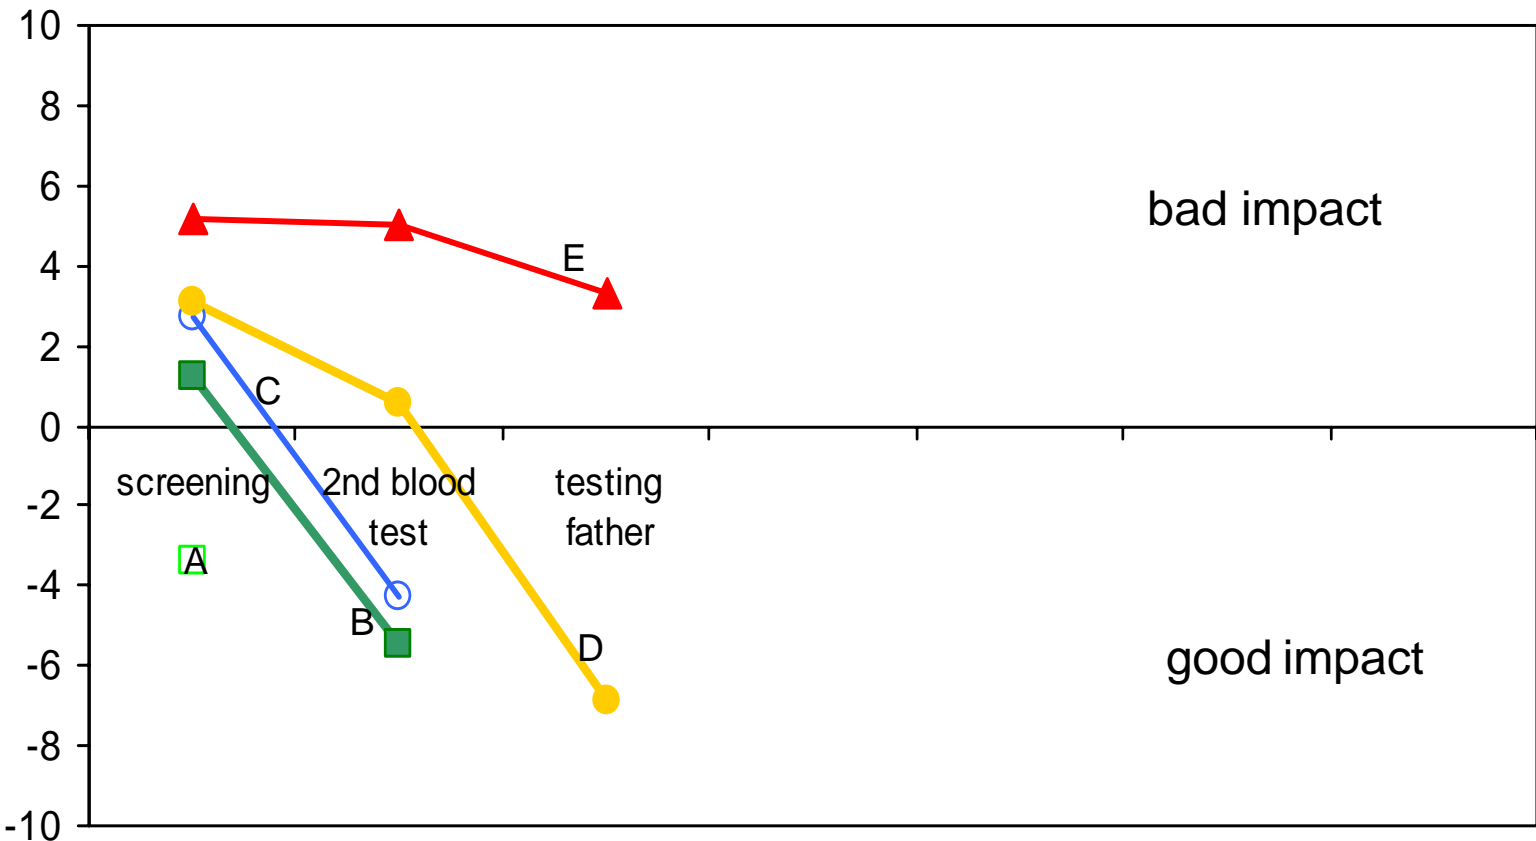

- controls (A)
- clinically non-relevant antibodies (C)
- ▲ clinically relevant antibodies, at risk (E)
- non-confirmed positive screen (B)
- clinically relevant antibodies, not at risk (D)
